# Supplementary material for: Ketone body 3-hydroxybutyrate elevates cardiac output through peripheral vasorelaxation and enhanced cardiac contractility
Source: PubMed Central journal article supplement (PMC10492777; doi:10.1007/s00395-023-01008-y), 2023-09-09
Supplement: 395_2023_1008_MOESM1_ESM.pdf [file 395_2023_1008_MOESM1_ESM.pdf]

Supplementary Material for

**Ketone body 3-hydroxybutyrate elevates cardiac output through peripheral vasorelaxation and enhanced cardiac contractility**

Casper Homilius<sup>1,\*</sup>, Jacob M. Seefeldt<sup>2,3,\*</sup>, Julie S. Axelsen<sup>2,3</sup>, Tina M. Pedersen<sup>1</sup>, Trine M. Sørensen<sup>1</sup>, Roni Nielsen<sup>2,3</sup>, Henrik Wiggers<sup>2,3</sup>, Jakob Hansen<sup>4</sup>, Vladimir V. Matchkov<sup>1</sup>, Hans E. Bøtker<sup>2,3</sup>, Ebbe Boedtkjer<sup>1</sup>

\*These authors contributed equally to this work

<sup>1</sup>Department of Biomedicine, Aarhus University, Aarhus, Denmark

<sup>2</sup>Department of Clinical Medicine, Aarhus University, Aarhus, Denmark

<sup>3</sup>Department of Cardiology, Aarhus University Hospital, Aarhus, Denmark

<sup>4</sup>Department of Forensic Medicine, Aarhus University, Aarhus, Denmark

| <b>Baseline characteristics, echocardiography</b>            |                         |                             |                 |
|--------------------------------------------------------------|-------------------------|-----------------------------|-----------------|
|                                                              | NaCl (before treatment) | Na-3-OHB (before treatment) | <i>P</i> -value |
| Weight (g)                                                   | 326±3                   | 317±5                       | 0.21            |
| Cardiac output (mL/min)                                      | 144±7                   | 125±11                      | 0.15            |
| Ejection fraction (%)                                        | 62.4±1.8                | 60.7±2.6                    | 0.88            |
| Heart rate (min <sup>-1</sup> )                              | 364±10                  | 350±13                      | 0.40            |
| Stroke volume (μL)                                           | 397±19                  | 358±28                      | 0.26            |
| End-diastolic volume (μL)                                    | 639±32                  | 585±27                      | 0.22            |
| End-systolic volume (μL)                                     | 242±20                  | 227±14                      | 0.57            |
| <b>Baseline characteristics, blood pressure measurements</b> |                         |                             |                 |
|                                                              | NaCl (before treatment) | Na-3-OHB (before treatment) | <i>P</i> -value |
| Weight (g)                                                   | 322±4                   | 311±7                       | 0.17            |

**Supplementary Table S1.** Baseline values from the *in vivo* echocardiography (n=8) and blood pressure (n=6-7) measurements. The data are mean±SEM and were compared using unpaired two-tailed Student's *t*-tests.

| <b>Baseline characteristics, isolated perfused hearts</b> |                         |                             |                 |
|-----------------------------------------------------------|-------------------------|-----------------------------|-----------------|
|                                                           | NaCl (before treatment) | Na-3-OHB (before treatment) | <i>P</i> -value |
| Left ventricular systolic pressure (mmHg)                 | 156.9±3.4               | 156.6±3.1                   | 0.95            |
| Left ventricular developed pressure (mmHg)                | 150.2±3.4               | 150.5±3.1                   | 0.94            |
| Heart rate (min <sup>-1</sup> )                           | 233±10                  | 238±10                      | 0.76            |
| Coronary flow rate (mL/min)                               | 16.2±1.5                | 15.3±1.0                    | 0.61            |

**Supplementary Table S2.** Baseline values recorded at the end of the stabilization period from *ex vivo* experiments on isolated hearts. The table summarizes 21 hearts tested with 3 or 10 mM Na-3-OHB and 19 hearts tested with matching concentrations of NaCl. The data are mean±SEM and were compared using unpaired two-tailed Student's *t*-tests.

| Isolated blood vessel characteristics |                                  |                                      |
|---------------------------------------|----------------------------------|--------------------------------------|
|                                       | Lumen diameter ( $\mu\text{m}$ ) | Initial maximal active tension (N/m) |
| Arteries                              |                                  |                                      |
| Coronary septal                       | 309 $\pm$ 6                      | 3.23 $\pm$ 0.13                      |
| Caudal femoral                        | 199 $\pm$ 7                      | 4.09 $\pm$ 0.26                      |
| Middle cerebral                       | 228 $\pm$ 8                      | 2.70 $\pm$ 0.21                      |
| Mesenteric                            | 240 $\pm$ 12                     | 7.44 $\pm$ 0.30                      |
| Renal interlobar                      | 344 $\pm$ 18                     | 4.46 $\pm$ 0.50                      |
| Veins                                 |                                  |                                      |
| Caudal femoral                        | 367 $\pm$ 19                     | 1.49 $\pm$ 0.10                      |
| Profound brachial                     | 616 $\pm$ 60                     | 2.44 $\pm$ 0.40                      |
| Mesenteric                            | 341 $\pm$ 39                     | 1.74 $\pm$ 0.19                      |

**Supplementary Table S3.** Characteristics of isolated blood vessels from the *ex vivo* experiments. The arteries and veins were evaluated based on a paired design where each blood vessel was exposed to multiple interventions (e.g., multiple concentrations of Na-3-OHB and NaCl) in alternating order between experiments. Alternatively, two blood vessels from the same animal were tested in parallel (e.g., Na-3-OHB vs. NaCl in presence of pharmacological inhibitors). The data are mean $\pm$ SEM, and n equals number of blood vessels: coronary septal arteries (n=66), caudal femoral arteries (n=20), middle cerebral arteries (n=15), mesenteric arteries (n=20), renal interlobar arteries (n=12), caudal femoral veins (n=23), profound brachial veins (n=10), and mesenteric veins (n=7).

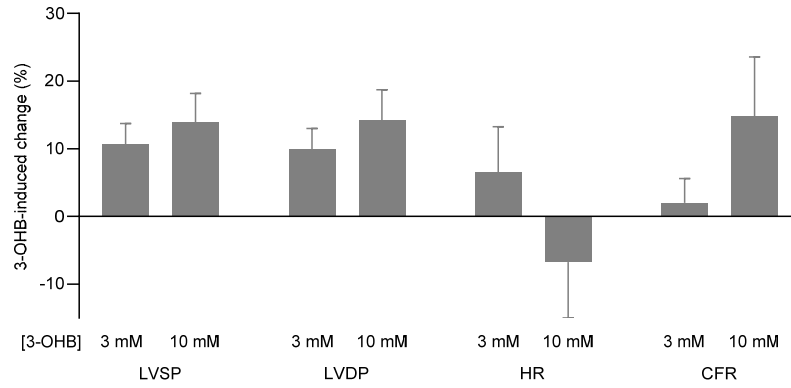

**Supplementary Figure S1.** 3-OHB-induced changes in cardiac parameters measured from isolated perfused hearts *ex vivo* (n=9-12) 20 minutes after buffer change. Values after 10 minutes are reported in Figure 2. Bars represent mean±SEM. Abbreviations: CFR, coronary flow rate; HR, heart rate; LVDP, left ventricular developed pressure; LVSP, left ventricular systolic pressure.

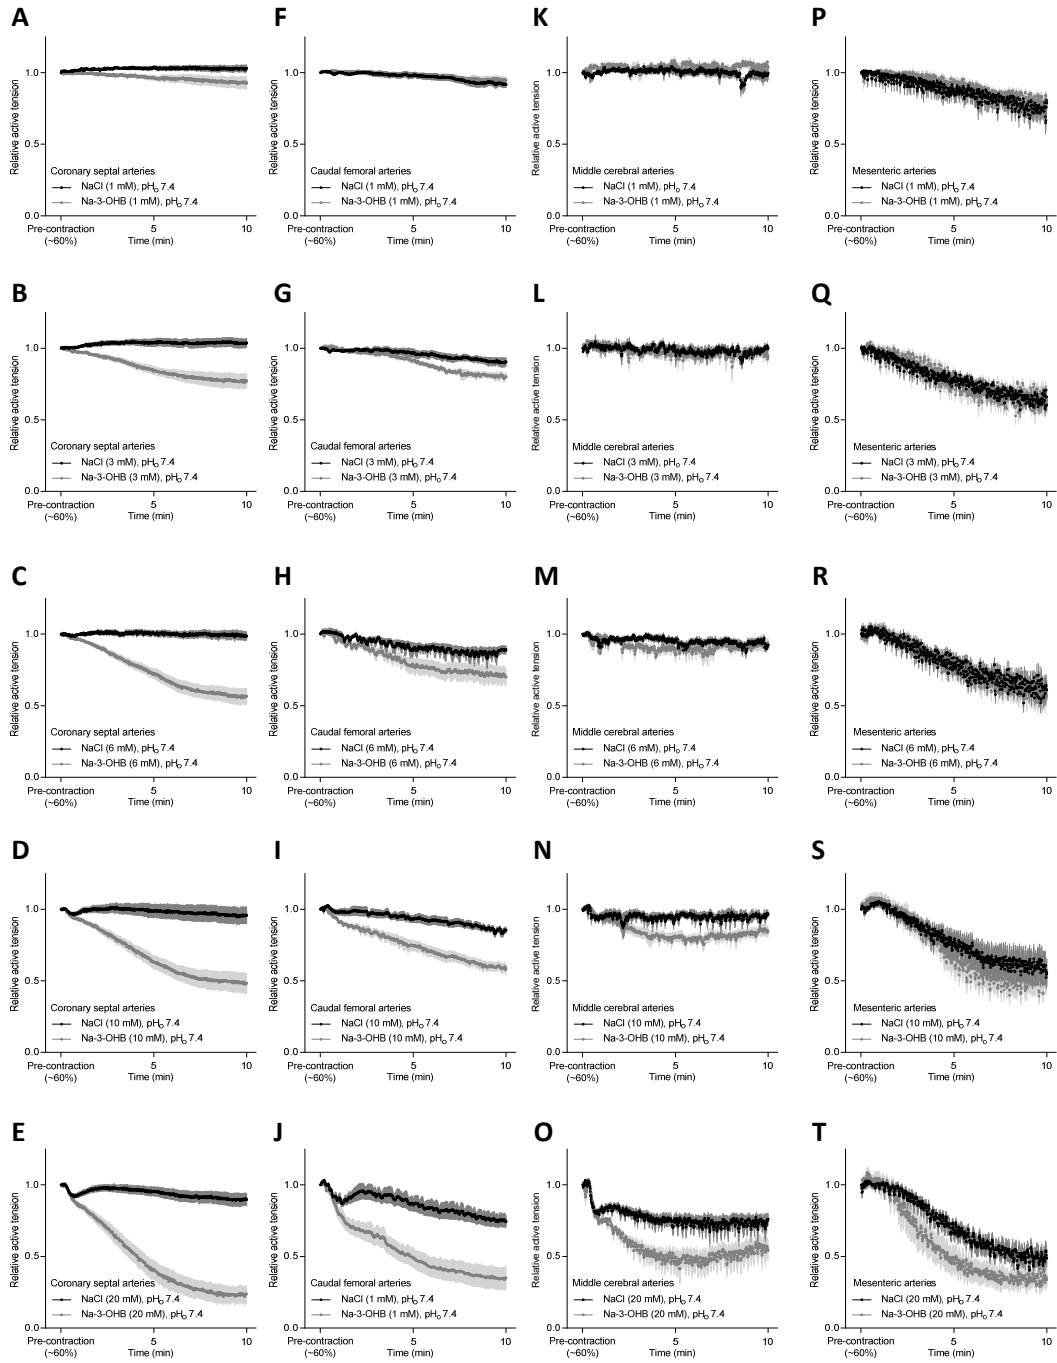

**Supplementary Figure S2.** Concentration-dependent arterial responses to 3-OHB, illustrated relative to a stable U46619-induced pre-contraction. **A-E**, coronary septal arteries ( $n=7$ , summarized data are shown in Figure 3B and 4B). **F-J**, caudal femoral arteries ( $n=8$ , summarized data are shown in Figure 4D). **K-O**, middle cerebral arteries ( $n=5$ , summarized data are shown in Figure 4F). **P-T**, mesenteric arteries ( $n=7$ , summarized data are shown in Figure 4H). The data are presented as mean $\pm$ SEM.

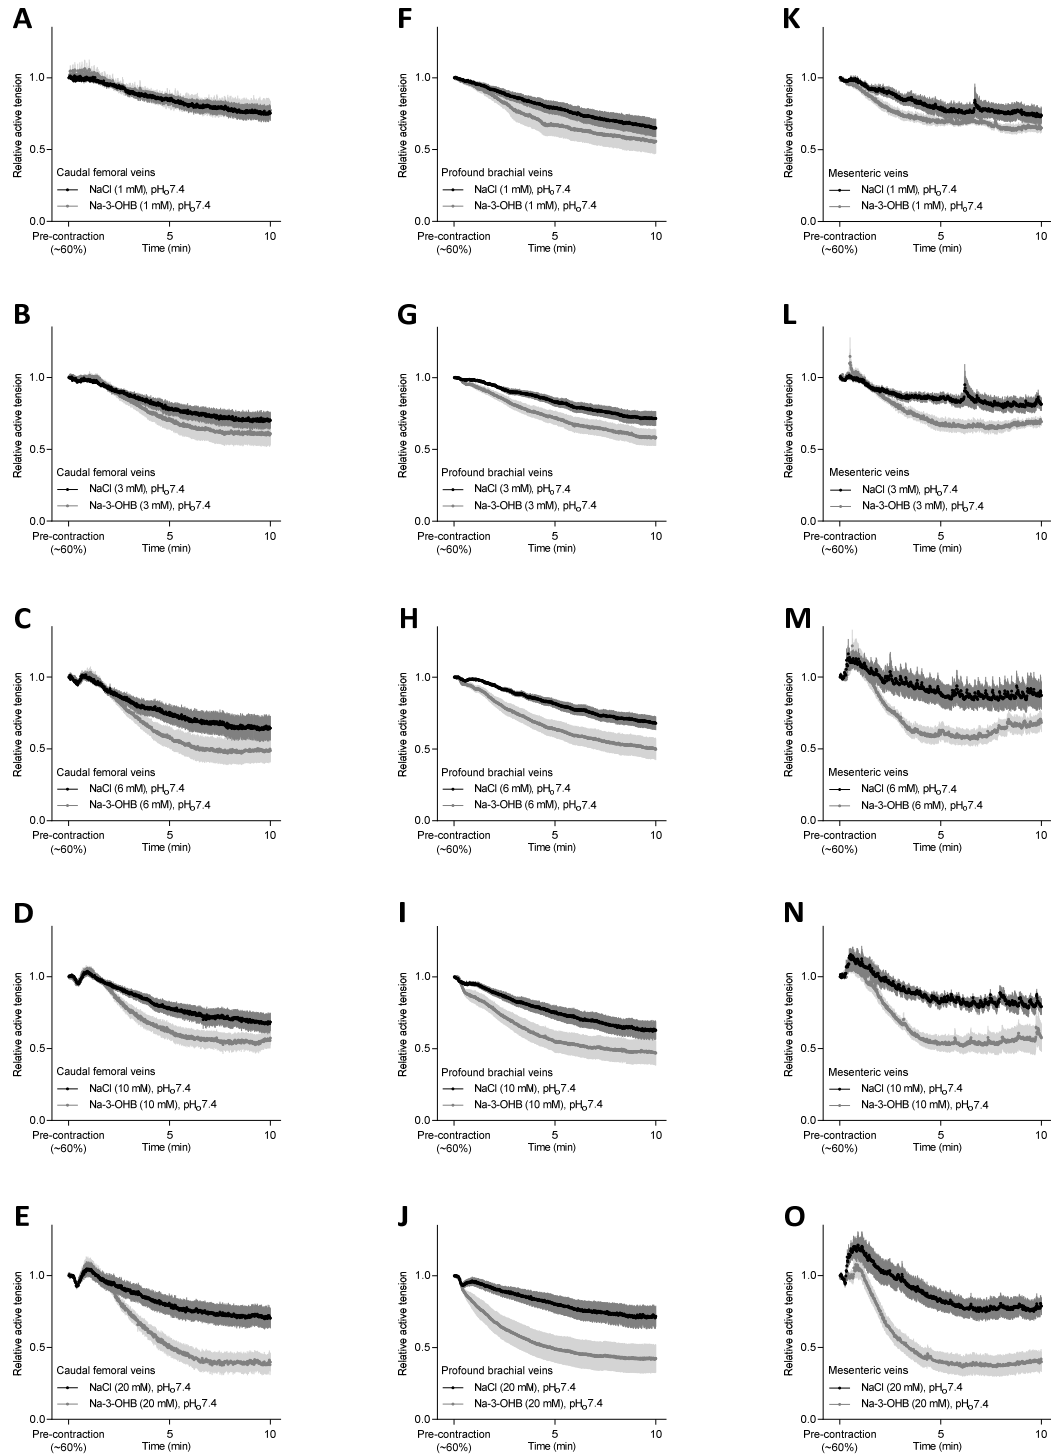

**Supplementary Figure S3.** Concentration-dependent venous responses to 3-OHB, illustrated relative to a stable U46619-induced pre-contraction. **A-E**, caudal femoral veins (n=10, summarized data are shown in Figure 5B). **F-J**, profound brachial veins (n=10, summarized data are shown in Figure 5C). **K-O**, mesenteric veins (n=8, summarized data are shown in Figure 5D). The data are presented as mean±SEM.

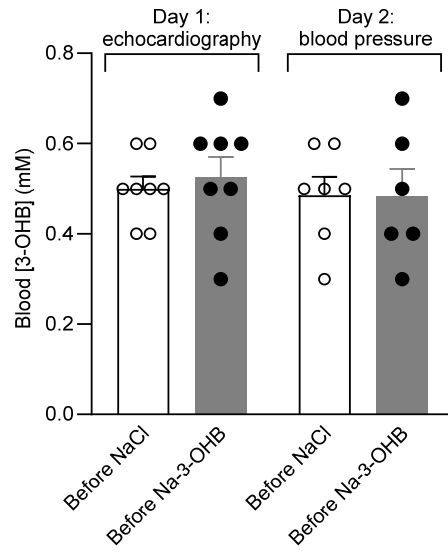

**Supplementary Figure S4.** Baseline blood concentrations of 3-OHB measured with a point-of-care device prior to administration of exogenous 3-OHB on day 1 (echocardiography) and day 2 (blood pressure) of the study. The bars represent mean±SEM.
